# Supplementary material for: Differential identity of Filopodia and Tunneling Nanotubes revealed by the opposite functions of actin regulatory complexes
Source: PubMed Central journal article supplement (PMC5180355; doi:10.1038/srep39632), 2016-12-23
Supplement: srep39632-s1.pdf [file srep39632-s1.pdf]

**Differential identity of Filopodia and Tunneling Nanotubes revealed by the  
opposite functions of actin regulatory complexes**

**AUTHORS :**

Elise Delage<sup>1</sup>, Diégo Cordero Cervantes<sup>1,#</sup>, Esthel Pénard<sup>1,#</sup>, Christine Schmitt<sup>2</sup>, Sylvie Syan<sup>1</sup>, Andrea Disanza<sup>3</sup>, Giorgio Scita<sup>3,4</sup>, Chiara Zurzolo<sup>1\*</sup>

<sup>1</sup> Unité Trafic Membranaire et Pathogénèse, Institut Pasteur, 25-28 Rue du Docteur Roux, 75724 Paris CEDEX 15, France

<sup>2</sup> Ultrapole, Institut Pasteur, 25-28 Rue du Docteur Roux, 75724 Paris CEDEX 15, France

<sup>3</sup> FIRC Institute of Molecular Oncology, 20139 Milan, Italy

<sup>4</sup> Dipartimento di Scienze della Salute, Università degli Studi di Milano, 20122 Milan, Italy

# These authors contributed equally to this work

\*corresponding author; e-mail: chiara.zurzolo@pasteur.fr

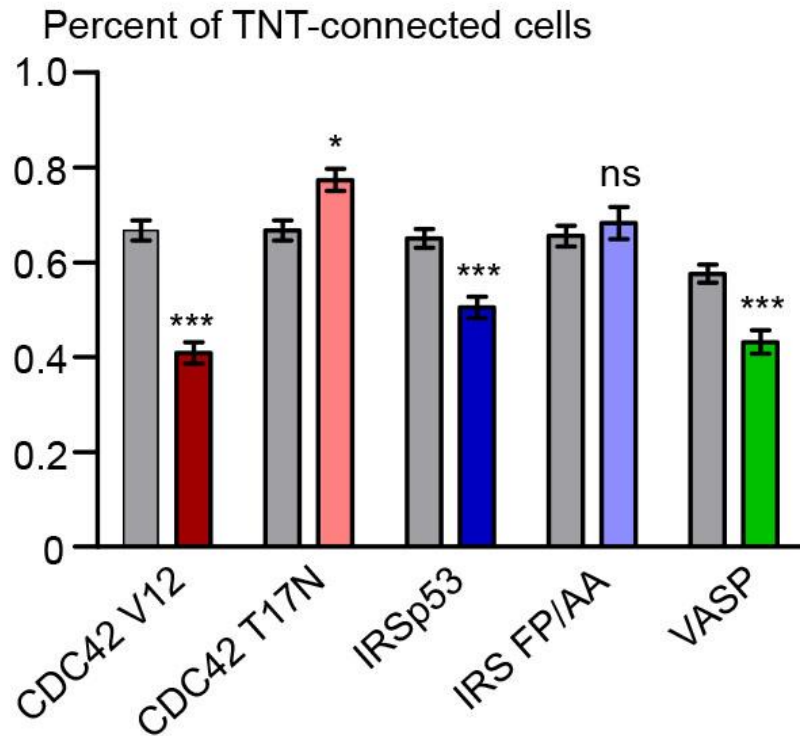

**Supplementary Figure 1. CDC42, IRSp53, and VASP negatively regulate the number of TNT-connected cells.**

Quantification of TNT-connected cells upon ectopic expression of GFP-CDC42 V12, GFP-CDC42 T17N, RFP-IRSp53, RFP-IRS FP/AA or GFPVASP (colored bars) compared to respective control (i.e. GFP or RFP, grey bars). The ratio of TNT-forming transfected cells/number of transfected cells was evaluated. Data represent the mean ( $\pm$ SEM) of at least 6 independent experiments. \*P < 0.05; \*\*P < 0.01; \*\*\*P < 0.001; ns = not significant.

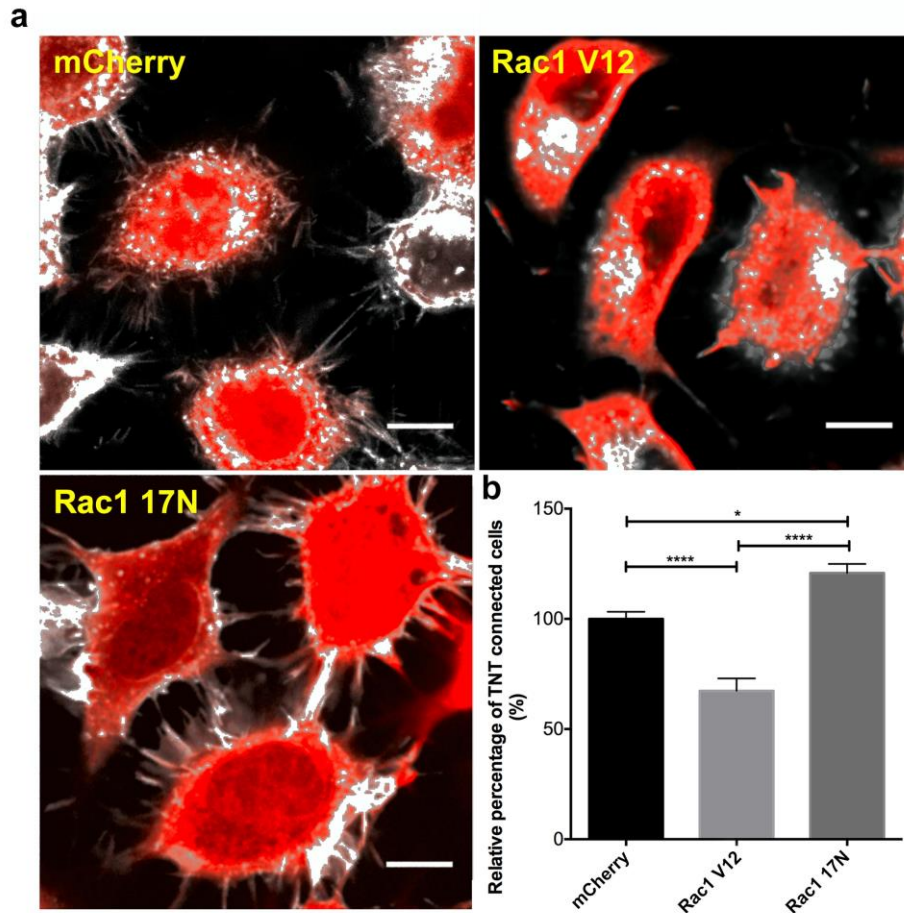

**Supplementary Figure 2. Rac1 negatively regulates the number of TNT-connected cells.**

a. Representative confocal images showing intercellular connections upon ectopic expression of Myc-Rac1 V12 (constitutively active form), Myc-Rac1 17N (dominant negative form), and their respective control, mCherry (red). Myc was detected by indirect immunofluorescence (red). Cells were observed by confocal microscopy. Scale bar = 10  $\mu$ M. b) Quantification of TNT-connected cells upon ectopic expression of mCherry, Myc-Rac1 V12, and Myc-Rac1 17N. The ratio of TNT-forming transfected cells/number of transfected cells was evaluated. Data represents the mean ( $\pm$ SEM), normalized to control cells (mCherry transfected cells) arbitrarily set at 100%, of 3 independent experiments. \*P < 0.05; \*\*P < 0.01; \*\*\*P < 0.001; ns = not significant.

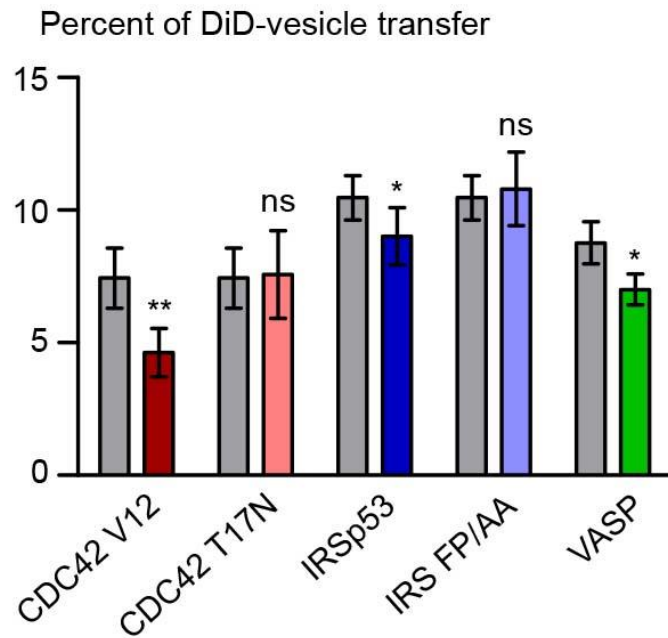

**Supplementary Figure 3. CDC42, IRSp53, and VASP negatively regulate intercellular vesicle transfer.**

Quantification by flow cytometry of DiD-positive acceptor cells upon ectopic expression of GFP-CDC42 V12, GFP-CDC42 T17N, RFP-IRSp53, RFP-IRS FP/AA or GFP-VASP (colored bars) in the donor population, compared to respective control (i.e. GFP or RFP, grey bars). The percentage of DiD-positive acceptor cells in the total cell population was evaluated. Data represent the mean ( $\pm$ SEM) of at least 4 independent experiments. \*P < 0.05; \*\*P < 0.01; \*\*\*P < 0.001; ns = not significant.

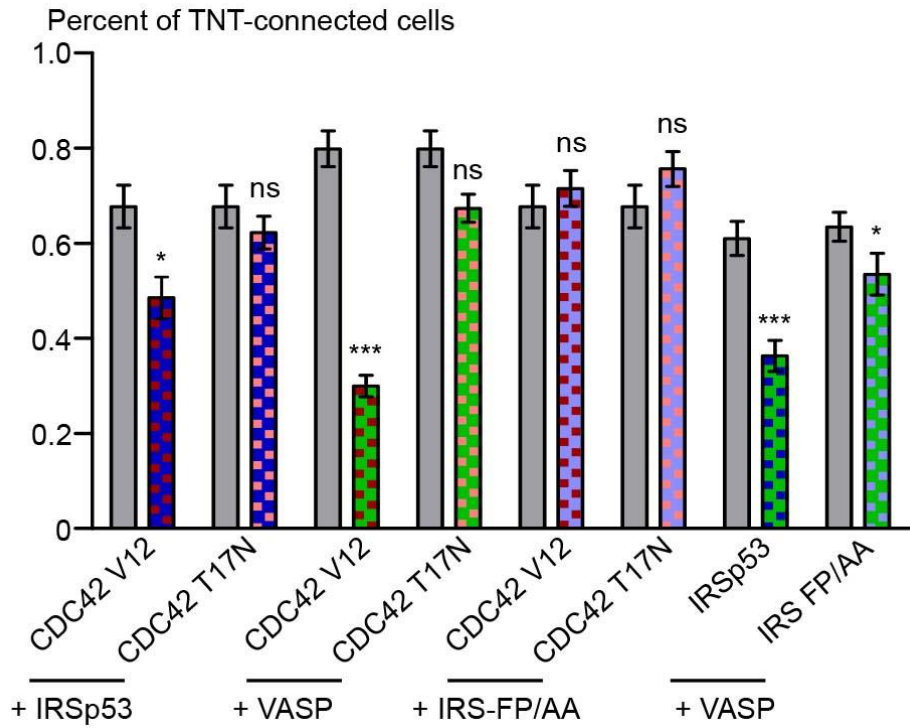

**Supplementary Figure 4. CDC42, IRSp53, and VASP act as a network to negatively regulate the number of TNT-connected cells.**

Quantification of TNT-connected cells upon co-transfection as indicated under the graph (colored bars) compared to respective controls (grey bars). Data represent the mean ( $\pm$ SEM) of at least 4 independent experiments. \*P < 0.05; \*\*P < 0.01; \*\*\*P < 0.001; ns = not significant.

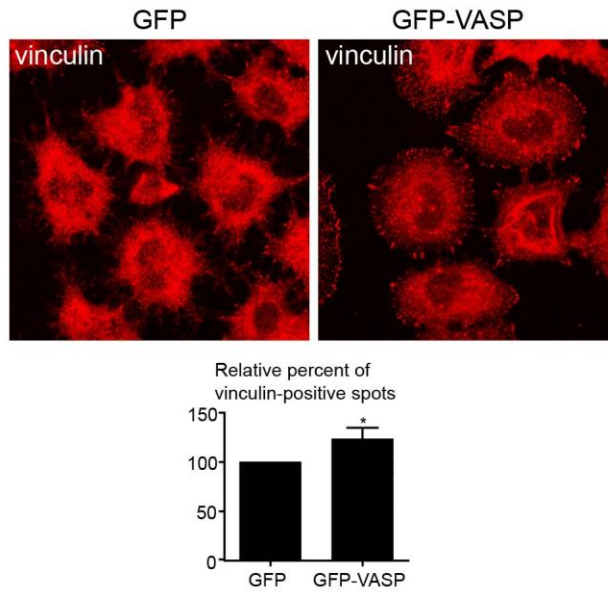

**Supplementary Figure 5. Ectopic expression of VASP increases the number of vinculin-positive cellular protrusions**

Cells were transiently transfected with GFP-VASP or GFP as a control. Cells were fixed 16 hrs post-plating and vinculin was detected by indirect immunofluorescence. The number of vinculin-positive peripheral focal adhesions was quantified using ICY. Data represent the mean ( $\pm$ SEM), normalized to control cells arbitrarily set at 100%, of at least 4 independent experiments. \*P < 0.05.

**a** Western blot

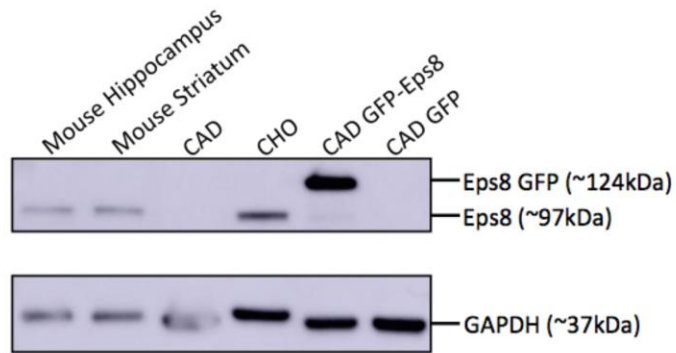

**b** RT-PCR

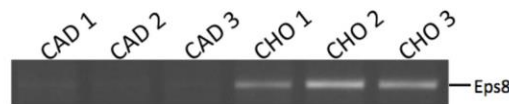

**Supplementary Figure 6. Endogenous expression of Eps8 via western blotting and RT-PCR**

a. Protein lysates from hippocampi and striata from mice at postnatal 21 days, CAD, CHO, CAD overexpressing GFP-Eps8, and CAD overexpressing GFP cells were immunoblotted for Eps8. 50  $\mu$ g of protein per lane. b. RT-PCR analysis of Eps8 mRNA in CAD and CHO cells.

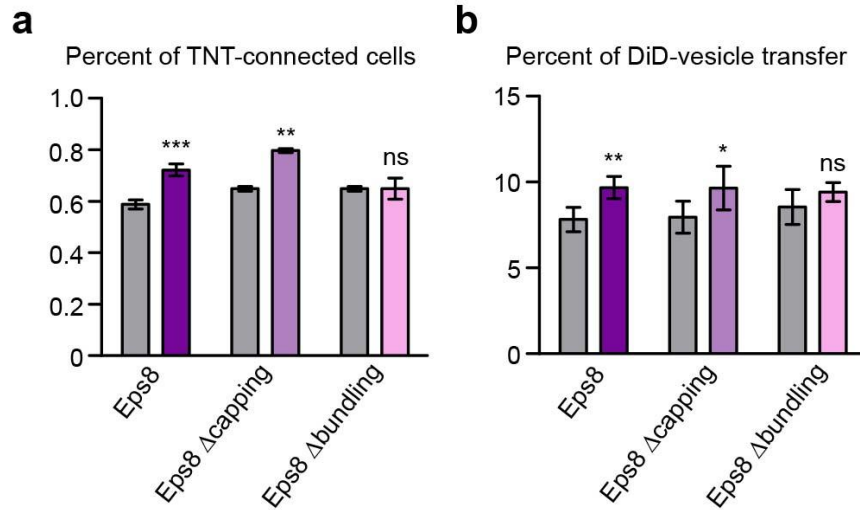

**Supplementary Figure 7. Eps8 positively regulates TNT formation and intercellular vesicle transfer via its bundling activity.**

a. Quantification of TNT-connected cells upon ectopic expression of GFP-Eps8, GFP-Eps8 $\Delta$ capping or GFP-Eps8 $\Delta$ bundling (colored bars), compared to their respective control (grey bars). b. Quantification by flow cytometry of DiD-positive acceptor cells upon ectopic expression of GFP-Eps8, GFP-Eps8 $\Delta$ capping or GFP-Eps8 $\Delta$ bundling (colored bars) in the donor population, compared to respective control (grey bars). Data represent the mean ( $\pm$ SEM) of at least 3 independent experiments. \*P < 0.05; \*\*P < 0.01; \*\*\*P < 0.001; ns = not significant.
